# Supplementary material for: A biodegradable, flexible photonic patch for in vivo phototherapy
Source: PubMed Central journal article supplement (PMC10224912; doi:10.1038/s41467-023-38554-x), 2023-05-27
Supplement: 41467_2023_38554_MOESM1_ESM.pdf [file 41467_2023_38554_MOESM1_ESM.pdf]

# Supporting information

## A biodegradable, flexible photonic patch for in vivo phototherapy

Kaicheng Deng<sup>#</sup>, Yao Tang<sup>#</sup>, Yan Xiao<sup>#</sup>, Danni Zhong<sup>#</sup>, Hua Zhang, Wen Fang, Liyin Shen, Zhaochuang Wang, Jiazhen Pan, Yuwen Lu, Changming Chen, Yun Gao, Qiao Jin, Lenan Zhuang, Hao Wan, Liuqing Zhuang, Ping Wang, Junfeng Zhai, Tanchen Ren, Qiaoling Hu, Meidong Lang, Yue Zhang, Huanan Wang, Min Zhou\*, Changyou Gao\*, Lei Zhang\*, Yang Zhu\*

### Contents

#### Supplementary Methods

**Supplementary Note 1.** Synthesis of CCS@gel.

**Supplementary Note 2.** Mechanical strength tests.

**Supplementary Note 3.** Patch substrate degradation in vitro.

**Supplementary Note 4.** Illumination demonstration on rat liver and hindlimb muscles.

**Supplementary Note 5.** Demonstration of 445 nm laser transmission.

**Supplementary Note 6.** Tumor photodynamic therapy in mice.

**Supplementary Note 7.** Characterization of light field distribution of different optical fibers.

**Supplementary Note 8.** Intramyocardial injection of Chlorella.

**Supplementary Note 9.** Immunofluorescent staining.

**Supplementary Note 10.** RNA-seq analysis.

**Supplementary Note 11.** ROS accumulation in cardiomyocytes after Chlorella and illumination treatment.

**Supplementary Note 12.** Phototoxicity assay.

**Supplementary Note 13.** Proliferation assay of cardiac fibroblasts.

**Supplementary Note 14.** Electrophysiology and myocardial contractility assay in vitro.

**Supplementary Note 15.** Measurement of heart rate of iCarP treated dog.

34 **Results**

35 **Supplementary Equation 1.** Shape of the tapered optical fiber.

36 **Supplementary Figure 1.** Fabrication and characterization of PMCL patch.

37 **Supplementary Figure 2.** iCarP adhesion and TOF removal.

38 **Supplementary Figure 3.** Electric field intensity distribution of light emitting for iCarP with  
39 different distance between the TOF tip and air gap tip ( $d$ ).

40 **Supplementary Figure 4.** Demonstration of iCarP application on rat hindlimb muscle and liver.

41 **Supplementary Figure 5.** iCarP guided light with wavelength of 445 nm onto an ex vivo porcine  
42 heart.

43 **Supplementary Figure 6.** Effects of tumor photodynamic therapy in mice.

44 **Supplementary Figure 7.** Light scattering effects of flat-end optical fibers, tapered optical fibers, and  
45 clinically used optical fibers.

46 **Supplementary Figure 8.** Evaluation of the potential risks of bleeding and inflammation caused by  
47 Chlorella injection.

48 **Supplementary Figure 9.** Expression of apoptosis markers in myocardium.

49 **Supplementary Figure 10.** RNA-seq analysis of cardiac tissues 1 day after surgery.

50 **Supplementary Figure 11.** Effect of Chlorella and light on ROS accumulation in cardiomyocytes,  
51 which was stained by DCFH-DA.

52 **Supplementary Figure 12.** Effect of extended illumination on cardiomyocyte viability.

53 **Supplementary Figure 13.** Effects of Chlorella and light on myocardial electrophysiology and  
54 myocardial contractility in vitro.

55 **Supplementary Figure 14.** Effect of iCarP on heart rate of a dog.

56

## 57 **Supplementary Methods**

### 58 **Supplementary Note 1. Synthesis of CCS@gel.**

59 CCS@gel was synthesized as previously described<sup>1</sup>. Briefly, the catechol-functionalized chitosan  
60 (CCS) was synthesized via the 1-ethyl-3-(3-dimethylaminopropyl) carbodiimide catalyzed amidation  
61 between the carboxyl group of hydrocaffeic acid and amino groups of chitosan, as the catechol  
62 substitution degree of 1% calculated from <sup>1</sup>H NMR analysis. The dibenzaldehyde-terminated  
63 polyethylene glycol (DB-PEG2000) was prepared by esterification of dihydroxyl-terminated PEG  
64 with 4-formylbenzoic acid, and PEG chains were modified with aldehyde groups at both ends. Then,  
65 a tissue-adhesive hydrogel (CCS@gel) was constructed in situ by mixing equal volume of CCS and  
66 DB-PEG2000 solutions, via Schiff base reactions between the amino groups of CCS and aldehyde  
67 groups of DB-PEG2000. During gelation, the catechol moieties of CCS could also react with amino  
68 groups on chitosan chains or tissue surface via Michael addition or Schiff base linkages, generating  
69 the network and offering tissue adhesiveness.

70

### 71 **Supplementary Note 2. Mechanical strength tests.**

72 Crosslinked PMCL was cut into 16 mm × 20 mm × 2 mm strips. Mechanical properties were  
73 measured by cyclic stretch of 10% strain over 100 cycles (stretching speed: 10 mm/min) using an  
74 Instron 5540A universal testing machine.

75 ICarP with different insertion depth of optical fiber was pre-adhered onto one end of myocardium  
76 using CCS@gel fixed in the wedge grip G1601-3 from MARK-10, the other end of the myocardium  
77 and the tapered optical fiber (TOF) were connected to M5I digital dynamometer from MARK-10.  
78 Adhesion strength between the patch substrate and TOF was obtained by measuring the force required  
79 to detach optical fiber from the patch.

80

### 81 **Supplementary Note 3. Patch substrate degradation in vitro.**

82 Discs of crosslinked PMCL (8 mm diameter) were incubated in PBS or PBS containing 2%  
83 Lipase B (w/w) at 37 °C, shook at 100 rpm (n = 4). Sample weight was recorded every 5 days.

84

### 85 **Supplementary Note 4. Illumination demonstration on rat liver and hindlimb muscles.**

86 Rat abdominal cavity was opened to expose the liver, then iCarP was adhered onto the liver by  
87 CCS@gel. After 5 min 660 nm illumination, the abdominal cavity was sutured, and TOF was removed  
88 using the similar method described in the myocardial infarction model. In the hindlimb muscle model,  
89 the thigh skin was incised to expose gracillis and flexor digitorum superficialis, followed by

90 attachment of iCarP using CCS@gel. The hindlimb was stretched to evaluate the robustness of tissue  
91 adhesion and the adhered, on-state iCarP. After laser illumination, the hindlimb skin was sutured, and  
92 TOF was removed.

93

#### 94 **Supplementary Note 5. Demonstration of 445 nm laser transmission.**

95 Laser diodes with 445 nm wavelength (LSR445NL) from Lasever Inc. was used as light sources,  
96 output power of laser diode or illumination intermittent were adjusted by controlling the pump current  
97 of laser diode drivers. Illumination on ex vivo porcine heart was recorded by a camera.

98

#### 99 **Supplementary Note 6. Tumor photodynamic therapy in mice.**

100 Nude mice (12 weeks old) were inoculated with  $1 \times 10^6$  4T1 cells into the breast pad, and randomly  
101 divided into six groups: (1) Control; (2) FITC; (3) FEOF; (4) iCarP; (5) FEOF + FITC; (6) iCarP +  
102 FITC. For groups 2, 5 and 6, 50  $\mu$ L of FITC (0.1 mg/mL) were injected into the tumors. Solid-state  
103 laser with wavelengths of 473 nm (CF60070, Changchun New Industries Optoelectronics Tech, China)  
104 were used as light sources for FEOF and iCarP (100 mW). ICarP indwelled in mice, animals received  
105 daily FITC injection and illumination for 3 days. Tumor volume and mouse body weight were  
106 monitored during the whole treatment (14 days). Tumor volume  $V$  ( $\text{mm}^3$ ) = length  $\times$  width<sup>2</sup>/2. Fourteen  
107 days after initial illumination, tumor tissues were excised and fixed in 5% formaldehyde. Tissue  
108 sections with a thickness of 5  $\mu$ m were stained with hematoxylin and eosin (H&E), CD31 and TUNEL.  
109 All sections were examined by a virtual slide microscopy (Olympus VS200, USA).

110

#### 111 **Supplementary Note 7. Characterization of light field distribution of different optical fibers.**

112 Flat-end optical fiber and tapered optical fibers with core diameter of 62.5  $\mu$ m, clinically used  
113 side glow optical fiber (core diameter: 400  $\mu$ m, diffusion length: 20 mm), clinically used matt flat-  
114 end optical fiber (core diameter: 400  $\mu$ m) were successively fixed on the center of a rotating  
115 breadboard (Thorlabs, USA) and remained stationary during the test. An optical power meter was  
116 fixed on the edge of the round breadboard and adjusted to the same height of the optical fibers. By  
117 rotating the round breadboard, the optical power meter revolved around the tips of these fibers and  
118 detected the output power at different angles (-90° to 90°). Considering that all these fibers are axially  
119 symmetric, the optical power distribution in the horizontal plane could represent the spatial  
120 distribution in the spherical space.

121

122 **Supplementary Note 8. Intramyocardial injection of Chlorella.**

123 Male SD rats were anesthetized with 4% chloral hydrate by intraperitoneal injection, followed  
124 by endotracheal intubation and assisted ventilation. The rats were placed in the supine position,  
125 followed by a left thoracotomy and pericardectomy to expose the hearts. Chlorella (100 uL,  $2 \times 10^7$ /mL)  
126 suspension was injected into LV wall of rats, followed by swab pressing for hemostasis. Subsequent  
127 to iCarP implantation, chest cavity, muscles and skin were sutured with 3-0 silk sutures. Rats were  
128 anesthetized and sacrificed at 3 d post injection to harvest Chlorella-injected hearts. Rat hearts were  
129 fixed with 4% paraformaldehyde, embedded in paraffin, and sectioned, followed by  
130 immunohistochemistry stained with IL-6 and TNF- $\alpha$  to evaluate LV inflammation. Stained slides were  
131 observed using an Olympus IX51 microscope. Images were captured using DP2-BSW software  
132 (Olympus, VS200, USA).

133

134 **Supplementary Note 9. Immunofluorescent staining**

135 Rats were anesthetized and sacrificed at 1 d post MI to harvest treated hearts. Rat hearts were  
136 fixed with 4% paraformaldehyde, embedded in paraffin, and sectioned. The hearts were  
137 immunofluorescently stained with DAPI, cTnT and Bcl-2 (Abcepta, China) /Bax (Abcam, UK)  
138 /Cleaved Caspase-3 (CST, US) to reveal apoptosis. Images were captured using DP2-BSW software  
139 (Olympus, VS200, USA), and analyzed by ImageJ software.

140

141 **Supplementary Note 10. RNA-seq analysis.**

142 RNA-seq analysis was performed according to the previous method<sup>2</sup>. Rats were anesthetized and  
143 sacrificed at 1 d post MI to harvest treated hearts of Sham, MI, and iCarP+/Light+ groups, followed  
144 by excising and storing at -80 °C before analysis (n = 4). RNA-seq experiments were performed by  
145 Novogene (Beijing, China). According to the manufacturer's recommendations, sequencing libraries  
146 were generated using NEBNext UltraTM RNA Library Prep Kit for Illumina (NEB, USA), and index  
147 codes were added to attribute sequences to each sample. Following the manufacturer's instructions,  
148 TruSeq PE Cluster Kit v3-cBot-HS (Illumina, USA) was used for the clustering of the index-coded  
149 samples on a cBot Cluster Generation System. After cluster generation, the libraries preparations were  
150 sequenced on an Illumina Novaseq 6000 platform, and 150 bp paired-end reads were generated. For  
151 data analysis, the short reads (Raw data) were transformed from original fluorescence image files  
152 obtained from the Illumina platform and recorded in FASTQ format, which contains sequence  
153 information and corresponding sequencing quality information. We used Fastp (version 0.19.7) to  
154 perform basic statistics on the quality of the raw reads. Clean data (clean reads) were obtained by

155 removing reads containing adapter contamination, low-quality nucleotides, and unrecognizable  
156 nucleotide (N) from Raw data. The reference genome and gene model notes files were downloaded  
157 directly from genome website. RNA-seq data were analyzed using Hisat2<sup>3</sup> and featureCounts<sup>4</sup> with  
158 DESeq2<sup>5</sup> to elucidate differentially expressed genes (adjusted p value < 0.05 and Log2 (fold change) >  
159 1 or < -1). Gene ontology (GO) analyses were performed by the Database for Annotation,  
160 Visualization, and Integrated Discovery<sup>6</sup> (DAVID). Transcriptomic data from bulk RNA sequencing  
161 are available through the National Center for Biotechnology Information Gene Expression Omnibus  
162 (GEO) under series accession no. [GSE223691](https://www.ncbi.nlm.nih.gov/geo/query/acc.cgi?acc=GSE223691). Code is available upon request.

163

#### 164 **Supplementary Note 11. ROS accumulation in cardiomyocytes after Chlorella and illumination** 165 **treatment.**

166 H9C2 cells (Cell Bank of Typical Culture Collection of Chinese Academy of Sciences, China)  
167 were divided into 4 groups in random: (1) Chlorella-/Light- (without Chlorella injection and light  
168 treatment); (2) Chlorella-/Light+ group (without Chlorella injection but with light treatment); (3)  
169 Chlorella+/Light- group (with Chlorella injection but without light treatment); (4) Chlorella+/Light+  
170 group (with Chlorella injection and light treatment), followed by seeding at a density of  $5 \times 10^3$  in  
171 DMEM with 10% FBS. After 24 h, the medium was replaced with fresh DMEM with 10% FBS in  
172 Chlorella-/Light- and Chlorella-/Light+ group, and fresh DMEM with 10% FBS and  $10^6$ /mL  
173 Chlorella in Chlorella+/Light- and Chlorella+/Light+ group, respectively. Chlorella-/Light- and  
174 Chlorella+/Light- group were incubated in dark at 37 °C and 5% CO<sub>2</sub>, as Chlorella-/Light+ and  
175 Chlorella+/Light+ group were incubated in light (660 nm, 55 mw) at 37 °C and 5% CO<sub>2</sub>. After 3 h,  
176 DCFH-DA (1:2000 v/v, in DMEM) was added. After 30 min, the wells were washed 3 times with  
177 PBS to remove excess probes. The fluorescence at 525 nm was excited by 488 nm, followed by  
178 measuring by a microplate reader (TECAN INFINITE M200PRO).

179

#### 180 **Supplementary Note 12. Phototoxicity assay.**

181 The H9C2 cells was seeded at a density of  $5 \times 10^3$  in DMEM with 10% FBS. After 24 h, the  
182 medium was replaced with fresh DMEM with 10% FBS and  $10^6$ /mL Chlorella, followed by  
183 incubation with different duration in light at 37 °C and 5% CO<sub>2</sub>. After incubation, the medium was  
184 replaced with DMEM containing 10% v/v CCK-8 reagent. After 2 h incubation, the absorbance of  
185 the medium at 450 nm was measured by a microplate reader (TECAN INFINITE M200PRO).

186

#### 187 **Supplementary Note 13. Proliferation assay of cardiac fibroblasts.**

188 Cardiac fibroblasts (CFs) were isolated from 2 to 3 days old neonatal rats using enzyme digestion  
189 method. Then CFs were divided into 4 groups in random: (1) Chlorella-/Light- (without Chlorella  
190 injection and light treatment); (2) Chlorella-/Light+ group (without Chlorella injection but with light  
191 treatment); (3) Chlorella+/Light- group (with Chlorella injection but without light treatment); (4)  
192 Chlorella+/Light+ group (with Chlorella injection and light treatment), followed by seeding at a  
193 density of  $5 \times 10^3$  in DMEM with 10% FBS. After 24 h, the medium was replaced with fresh DMEM  
194 with 10% FBS in Chlorella-/Light- and Chlorella-/Light+ group, and fresh DMEM with 10% FBS  
195 and  $10^6$ /mL Chlorella in Chlorella+/Light- and Chlorella+/Light+ group, respectively. Chlorella-  
196 /Light- and Chlorella+/Light- group were incubated for 3 h in dark at 37 °C and 5% CO<sub>2</sub>, as Chlorella-  
197 /Light+ and Chlorella+/Light+ group were incubated in light for 3 h (660 nm, 55 mw) at 37 °C and  
198 5% CO<sub>2</sub>. After light treatment, the CFs were continuedly incubated at 37 °C and 5% CO<sub>2</sub> for 1, 3 and  
199 5 days. After the rated incubation time, the medium was replaced with DMEM containing 10% v/v  
200 CCK-8 reagent. After 2 h incubation, the absorbance of the medium at 450 nm was measured by a  
201 microplate reader (TECAN INFINITE M200PRO).

202

#### 203 **Supplementary Note 14. Electrophysiology and myocardial contractility assay in vitro.**

204 Primary cardiomyocytes were isolated from 2 to 3 days old neonatal rats using enzyme digestion  
205 method. Then cells were divided into 2 groups in random: (1) Chlorella+ group (with Chlorella  
206 injection); (2) Chlorella- (without Chlorella injection), followed by culturing in DMEM with 10%  
207 FBS in E-Plate Cardio 96, which had microelectrodes (MEs) and interdigitated electrodes (IDEs).  
208 The extracellular action potential (EAP) was recorded by MEs. When primary cardiomyocytes  
209 produced rhythmic contraction, it caused changes in cell morphology. Increasing the excitation  
210 frequency of IDEs could simultaneously obtain mechanical beating (MB) of the cells. At day 5, light  
211 treatment (660 nm, 55 mW) was performed in both groups for 3 h. The electrophysiology and beating  
212 of the cells through the laser and xCELLigence RTCA Cardiosystem system (Agilent Technologies  
213 Inc, USA) were collected. Feature parameters including EAP amplitude, MB amplitude and firing  
214 rate were extracted for analysis to quantify the characteristics of the EAP and MB.

215

#### 216 **Supplementary Note 15. Measurement of heart rate of iCarP treated dog.**

217 The procedure of preoperative preparation and anesthesia was the same as described in the  
218 “minimally invasive implantation” section in Methods. Lactated Ringer was used to replenish body  
219 fluids. The dog was adjusted to supine posture on heated operation table, the thoracic surgery area was  
220 shaved, cleaned, disinfected, and aseptic hole-towel was laid. An incision was made between the fifth  
221 rib and the sixth rib, the skin and muscle are cut in sequence, the pleura was opened, and the thoracic

222 retractor was used to expand the surgical field. After confirming the position of the heart, the  
223 pericardium was cut to expose the surface of the heart. ICarP was attached to the apex of the heart for  
224 illumination, and iCarP was detached after recording the electrocardiography data as baseline.  
225 Subsequently, LAD and LCx was ligated to cause myocardial infarction, and iCarP was again attached  
226 to repeat above process, recording the electrocardiography data. After the surgery, iCarP was detached  
227 and the pericardium was sutured. The instruments were taken out, the chest cavity was sutured and  
228 closed, disinfected with povidone iodine, and gauze was applied to cover the wound. Ventilator was  
229 retained for 1 hour before recovery of spontaneous respiration. For analgesia and anti-inflammation,  
230 0.6 mL meloxicam was subcutaneously injected.

231

232

233

234

$$235 \quad F(z) = 62.5 - 56.36e^{-\left(\frac{0.485z+16.18}{65.81}\right)^2} + 0.6324e^{-\left(\frac{0.485z+0.5469}{0.1508}\right)^2} + 1.103e^{-\left(\frac{0.485z+24.78}{-0.02043}\right)^2}$$
$$236 \quad - 12.1e^{-\left(\frac{0.485z+13.07}{-22.32}\right)^2}$$

237 **Supplementary Equation 1.** Shape of the tapered optical fiber.  $F(z)$  is the radius of TOF at position  $z$   
238 **(Fig. 2f).**

239

240

241



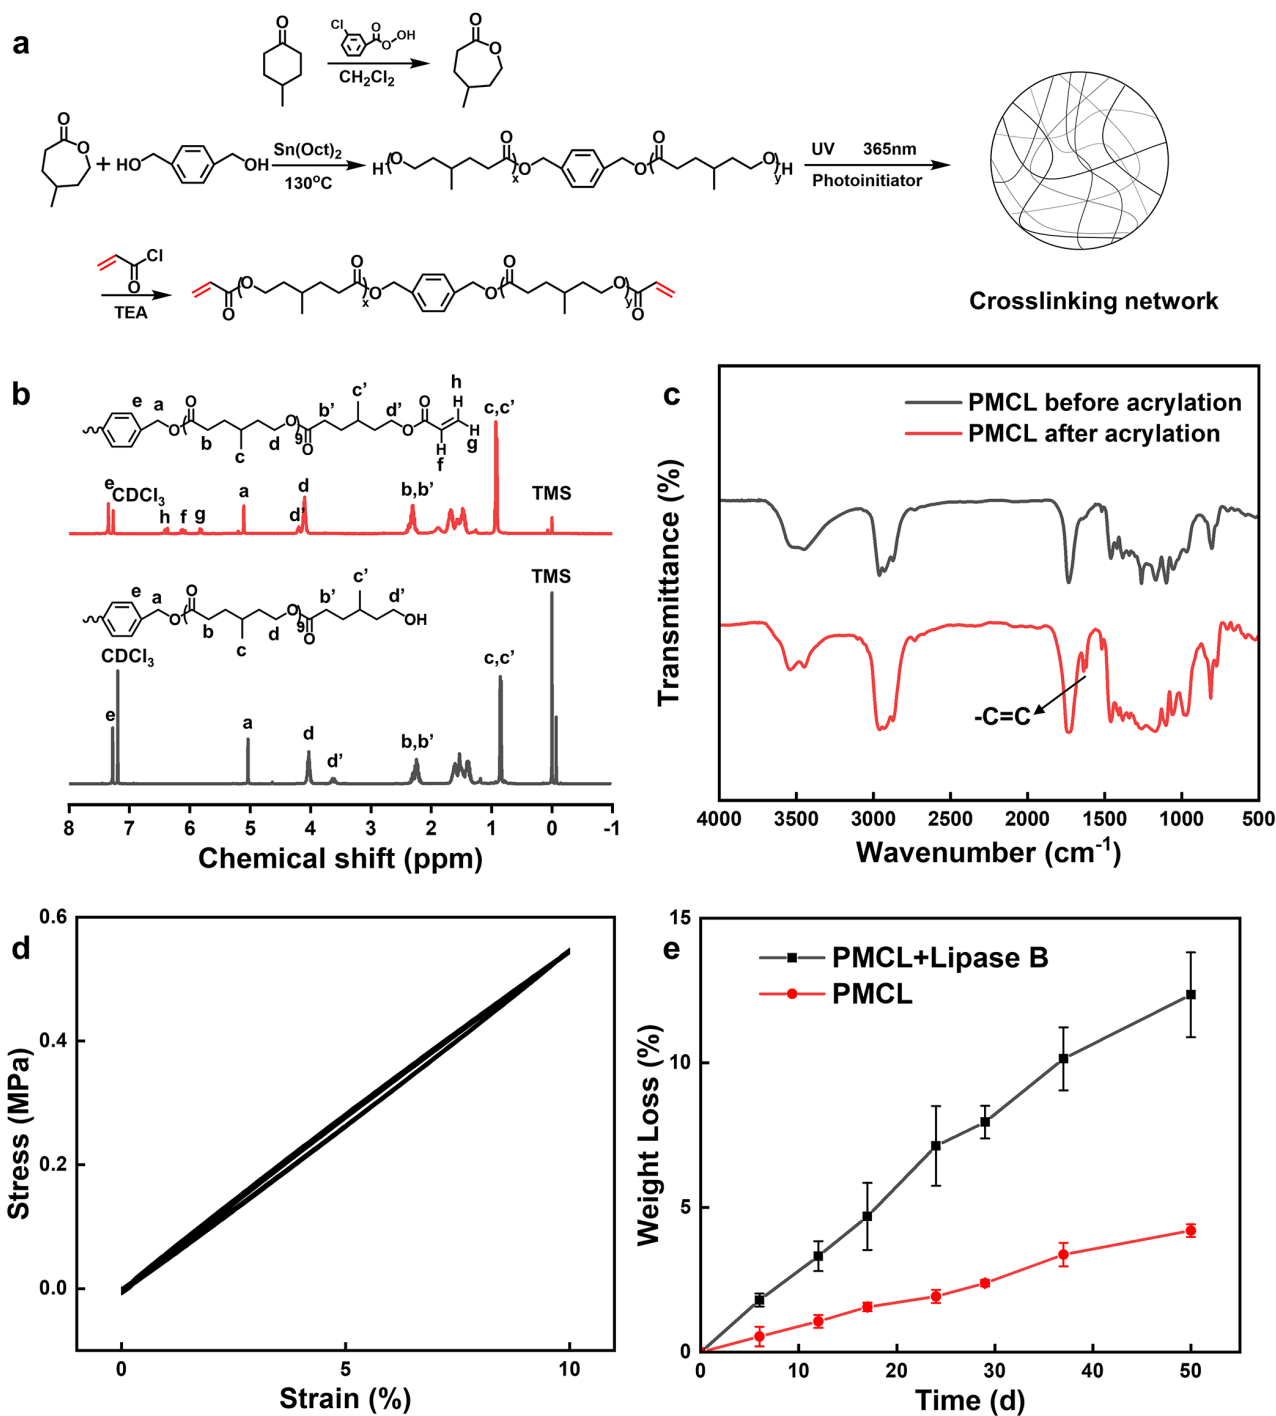

242

243 **Supplementary Figure 1. Fabrication and characterization of PMCL patch.** **a** Synthesis (left)  
 244 and crosslinking of PMCL patch (right). **b** The structure and  $^1\text{H}$  NMR spectra of PMCL after  
 245 acrylation (up) and PMCL before acrylation (down). **c** FT-IR of PMCL before (black) and after di-  
 246 acrylation (red). **d** Cyclic stretch of PMCL patch at 10% strain for 100 times. **e** Degradation of PMCL  
 247 patches with or without Lipase in vitro ( $n=3$  per group), data are presented as means  $\pm$  SD.

248

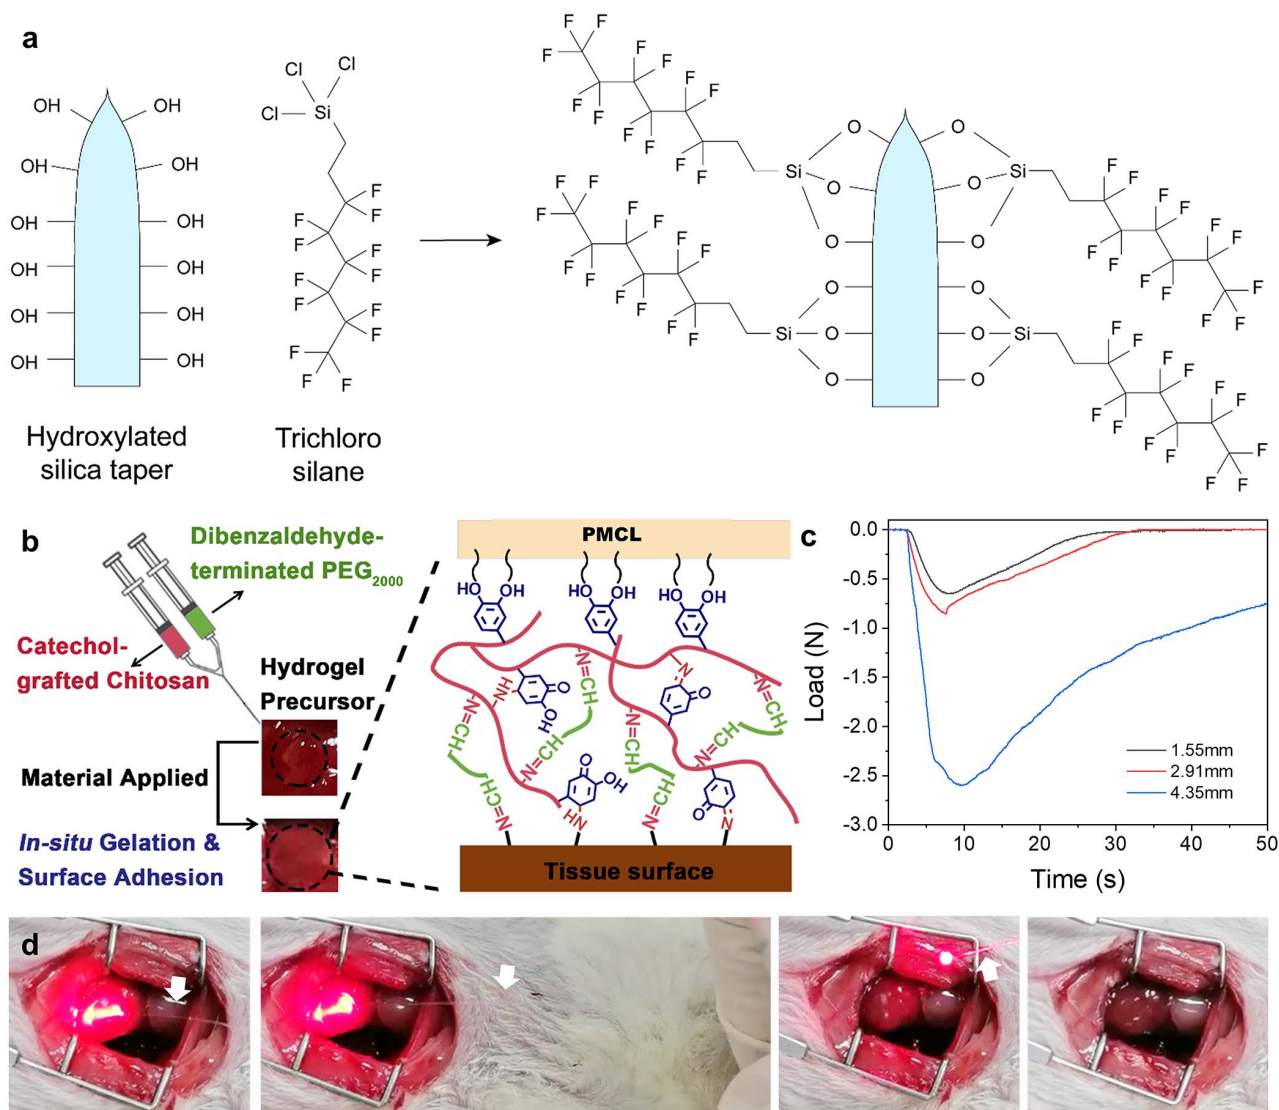

249

250 **Supplementary Figure 2. ICarP adhesion and TOF removal.** **a** Scheme of trichloro silane  
 251 treatment of TOF surface. **b** Scheme and device adhesion on tissue surface by CCS@gel<sup>1</sup>. **c** Adhesion  
 252 strengths between PMCL substrate and TOF at different insertion depths. Mechanical loads during  
 253 pulling-out of TOFs from PMCL patch. **d** Removal of TOF from an iCarP adhered on a beating rat  
 254 heart using the same process in Fig. 5b.

255

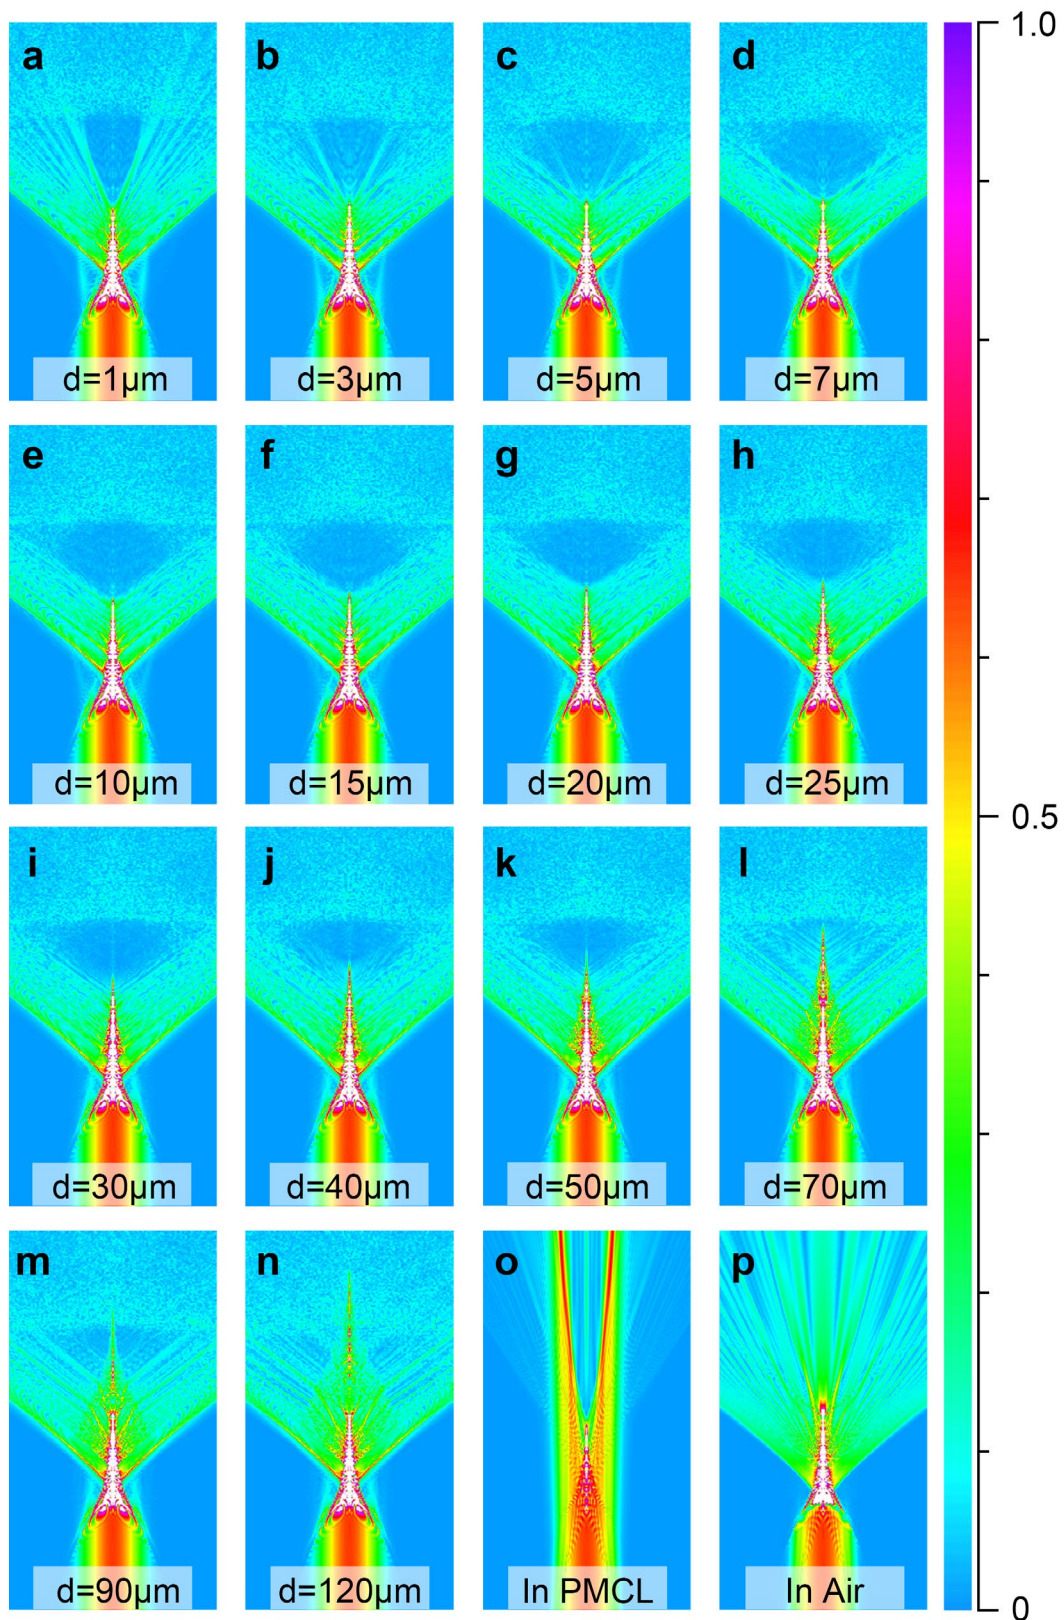

256

257 **Supplementary Figure 3. Electric field intensity distribution of light emitting for iCarP with**  
 258 **different distance between the TOF tip and air gap tip ( $d$ ). a-n 1-120  $\mu\text{m}$ . o 0  $\mu\text{m}$  (TOF in PMCL**  
 259 **without air gap). p TOF in air without PMCL.**



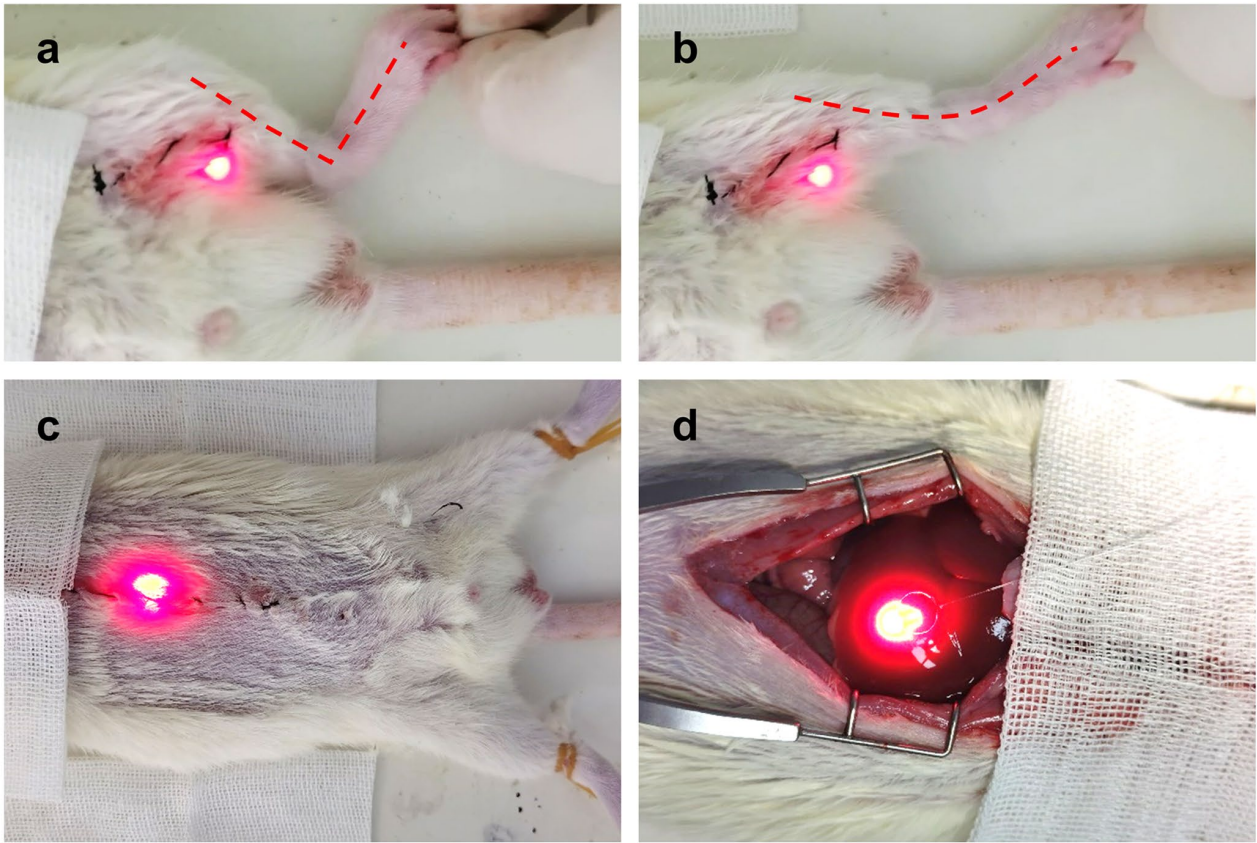

260

261 **Supplementary Figure 4. Demonstration of iCarP application on rat hindlimb muscle and liver.**

262 iCarP illumination on (a) bent, (b) stretched hindlimb (the red dotted line represents the hindlimb of  
263 rat) and liver in (c) closed, (d) opened abdominal cavity.

264

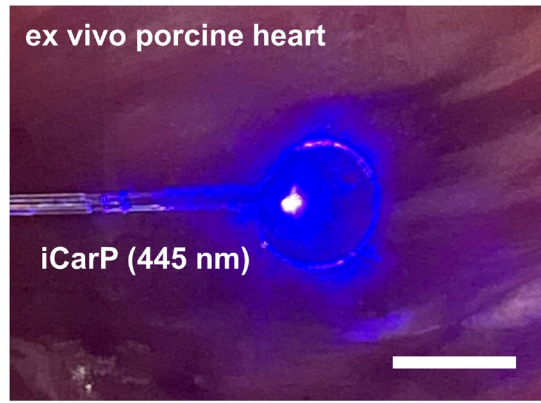

265

266 **Supplementary Figure 5. ICarP guided light with wavelength of 445 nm onto an ex vivo porcine**  
267 **heart. Scale bar = 5 mm.**

268

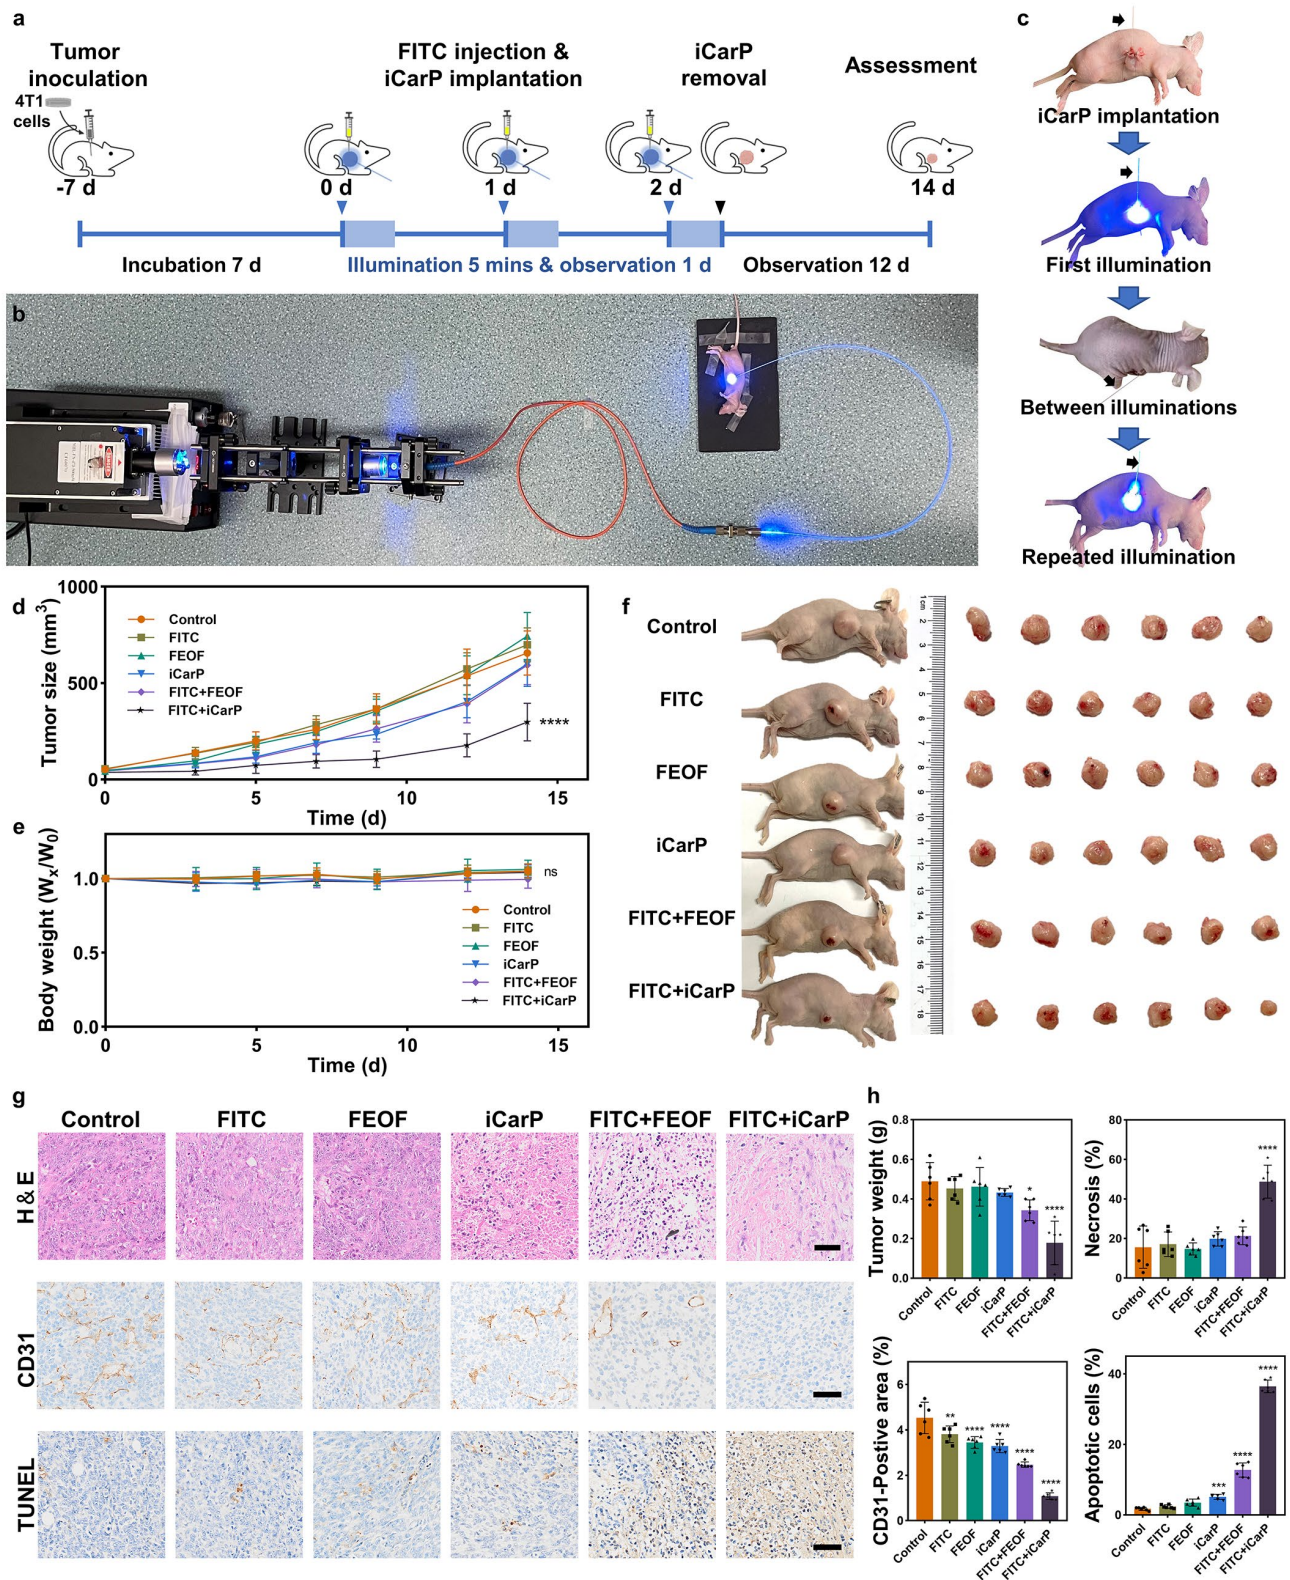

269

270

271 **Supplementary Figure 6. Effects of tumor photodynamic therapy in mice.** a Timeline of the animal  
 272 study. Mice received following treatments 7 days after 4T1 cells inoculation. Control group: no  
 273 treatment; FITC group: FITC injection in tumor, no illumination; FEOF group: flat-end optical fiber

274 illumination without FITC injection; iCarP group: iCarP illumination without FITC injection;  
275 FITC+FEOF group: FITC injection with FEOF illumination; FITC+iCarP group: FITC injection with  
276 repeated iCarP illumination. **b** Image of the mice and equipments during iCarP illumination. **c** Photos  
277 of repeated iCarP illumination on the same mouse. **d** Growth curves of tumor after different treatments  
278 (n = 6 per group). **e** Body weight curves of mice for 14 d after different treatments (n = 6 per group).  
279 Statistical significance was calculated using one-way ANOVA with Bonferroni's posttest to compare  
280 Tumor size and Body weight on d 14 among the 6 groups and data are presented as means  $\pm$  SD, \*\*\*  
281  $*p < 0.0001$  vs control group. **f** Photos of mice and the excised tumors 14 d after treatment. **g**  
282 Representative H&E, CD31, and TUNEL staining images of tumors, scale bar = 50  $\mu$ m. **h** Quantitative  
283 analysis of tumor weight, necrosis (%), CD31 positive area (%), and apoptotic cells (%) (n = 6 per  
284 group). Statistical significance was calculated using one-way ANOVA with Bonferroni's posttest and  
285 data are presented as means  $\pm$  SD.  $*p < 0.05$ ,  $**p < 0.01$ ,  $***p < 0.001$ ,  $****p < 0.0001$  vs control  
286 group. Source data and exact  $p$ -values are provided in the Source Data file.  
287



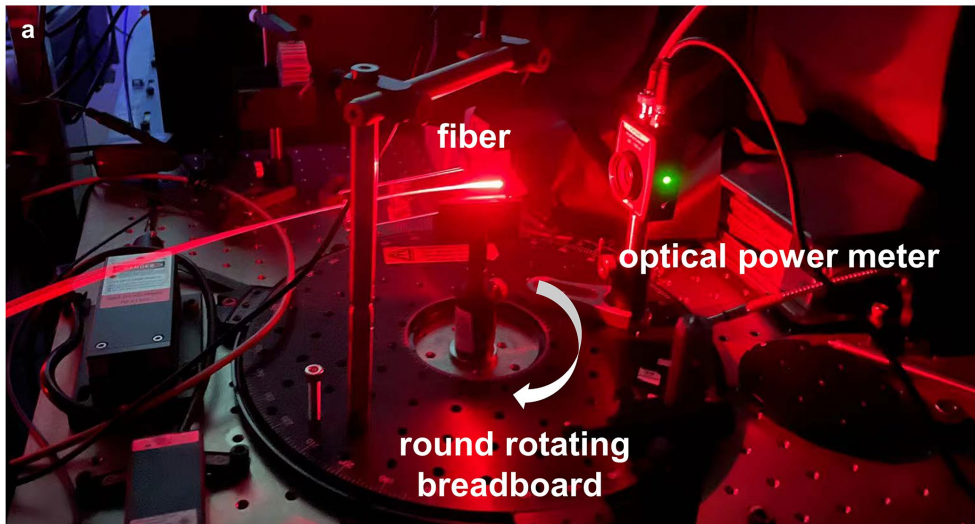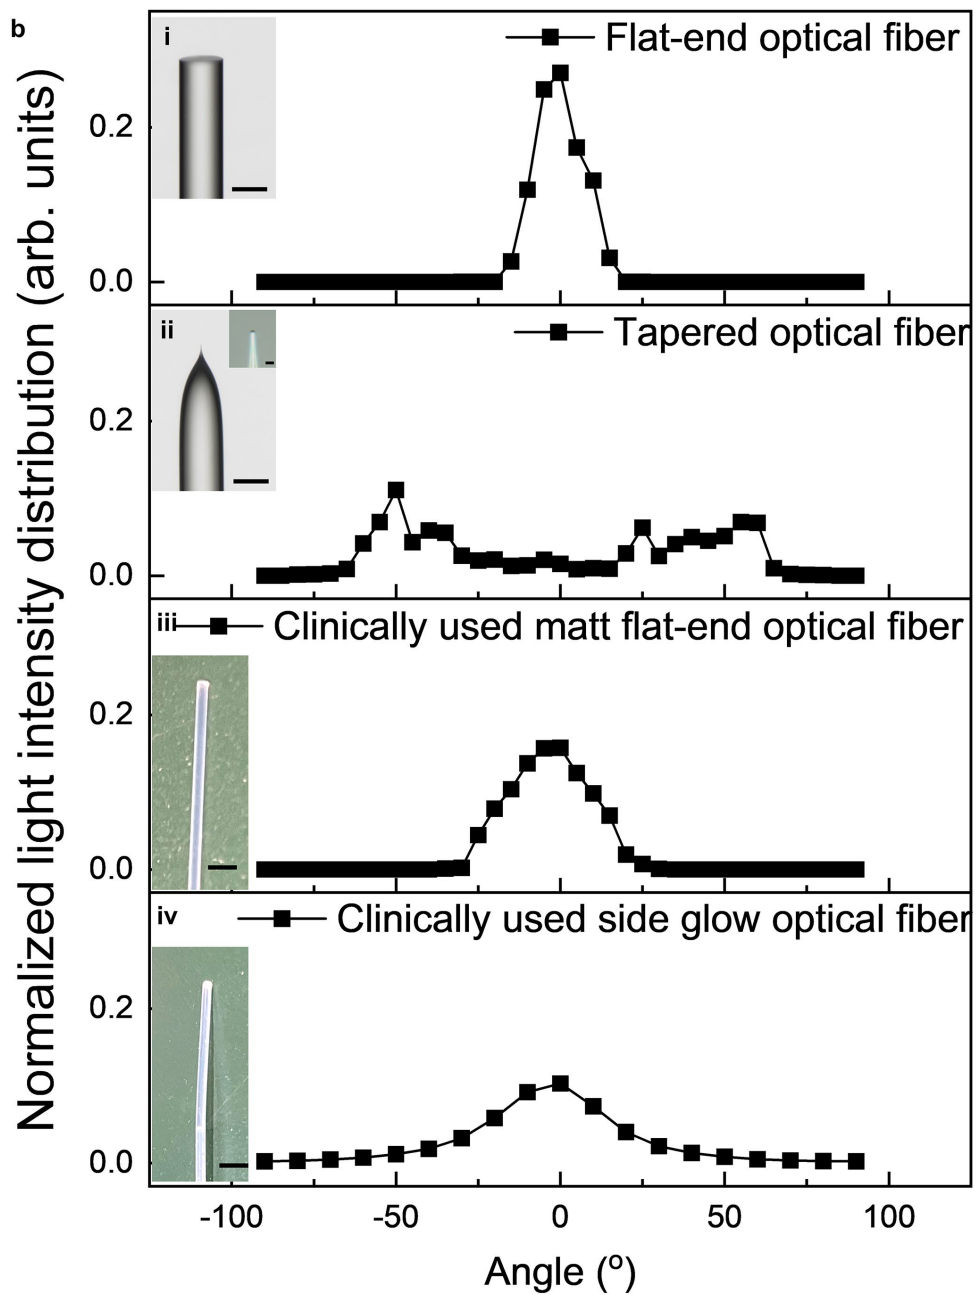



289 **Supplementary Figure 7. Light scattering effects of flat-end optical fibers, tapered optical fibers,**  
290 **and clinically used optical fibers. a** Equipment for light distribution measurement. **b** Normalized light  
291 distribution of (i) flat-end optical fiber (core diameter: 62.5  $\mu\text{m}$ ), inset: microscopic view of the tip of  
292 flat end, scale bar = 100  $\mu\text{m}$ . (ii) Tapered optical fiber, inset: microscopic view of tapered fiber end,  
293 scale bar = 100  $\mu\text{m}$ . (iii) Clinically used matt flat-end optical fiber (core diameter: 400  $\mu\text{m}$ ), inset:  
294 appearance of fiber end, scale bar = 4 mm. (iv) Clinically used side glow optical fiber, inset: appearance  
295 of the fiber end, scale bar = 4 mm. Insets of i-iv are representative images of  $\geq 2$  samples.

296

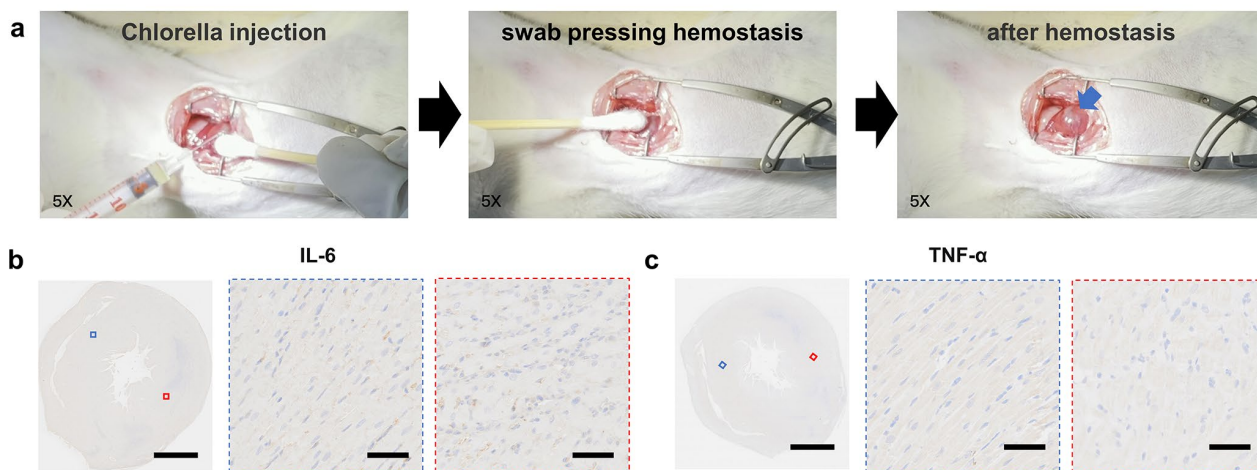

297

298 **Supplementary Figure 8. Evaluation of the potential risks of bleeding and inflammation caused**

299 **by Chlorella injection. a** Chlorella suspension was injected into LV wall of rats, followed by swab

300 pressing for hemostasis (injection site and distributed Chlorella are pointed by blue arrow). Minor

301 bleeding caused by the insulin needle was stopped by swab pressing within seconds. Corresponding

302 video was added as Supplementary video 6. **b, c** Representative immunofluorescent staining images

303 of IL-6 (**b**) and TNF- $\alpha$  (**c**) in rat hearts 3 d after Chlorella injection in LV myocardium, n = 3

304 biologically independent samples, scale bar = 2 mm. Inset: magnified images, scale bar = 50  $\mu$ m. Each

305 experiment was repeated 4 times independently.

306

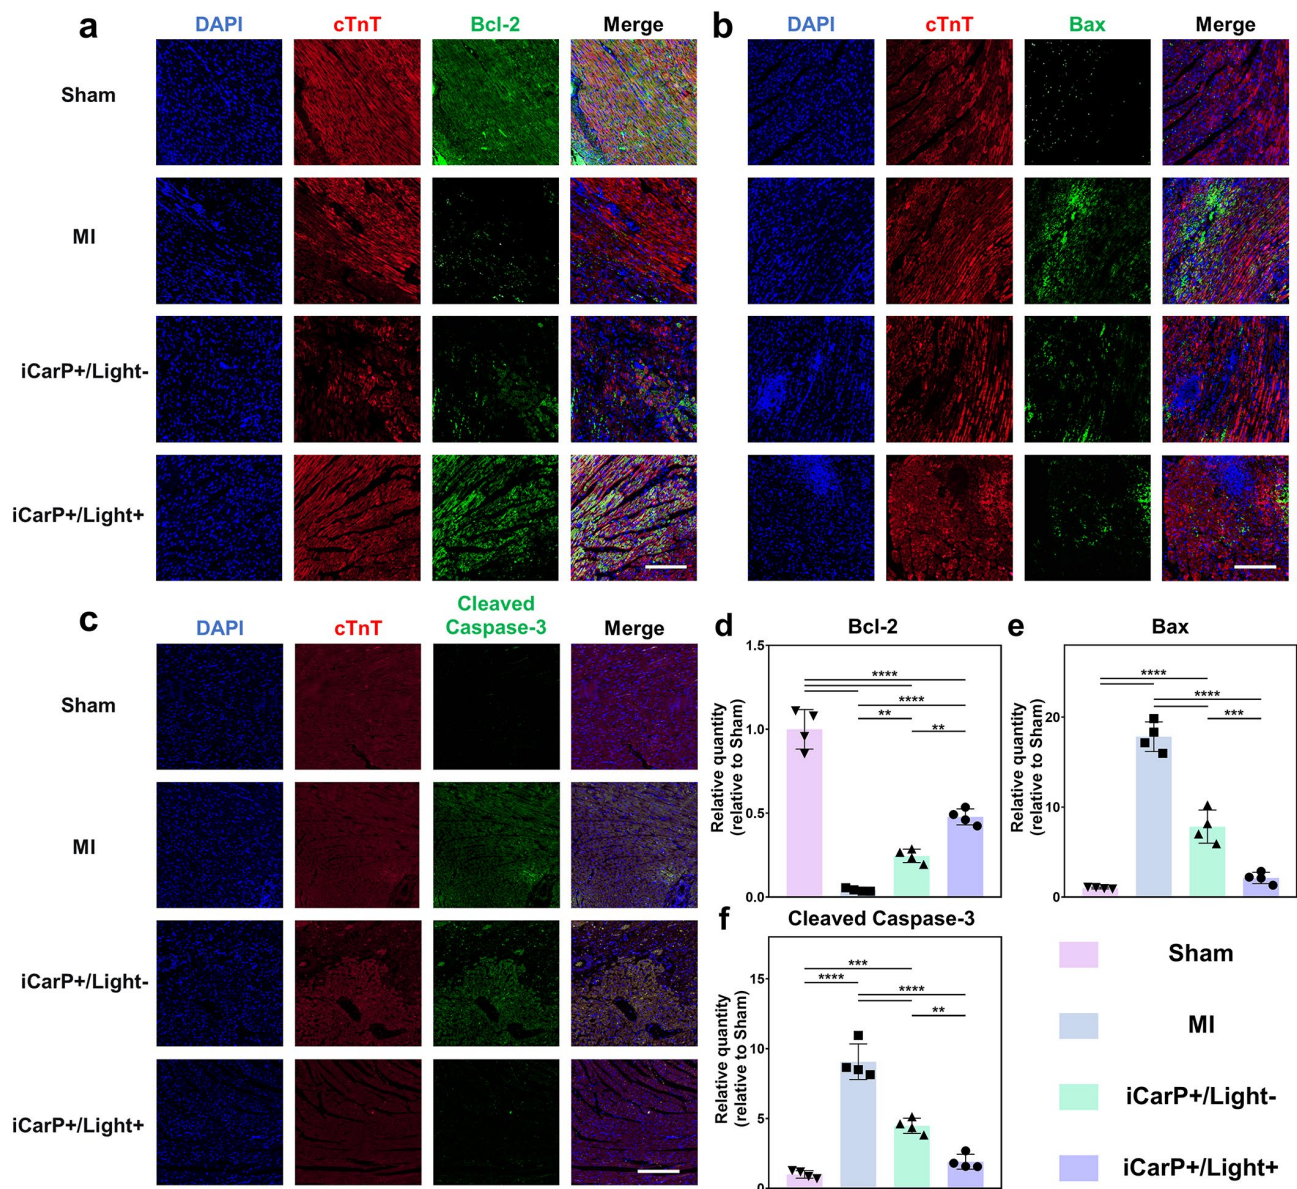

307

308 **Supplementary Figure 9. Expression of apoptosis markers in myocardium.** Representative

309 immunofluorescent staining images of cTnT/Bcl-2 (a), cTnT/Bax (b) and cTnT/Cleaved Caspase-3

310 (c) in left ventricular 1 d after MI (nuclei: blue, cTnT: red, Bcl-2/Bax/Cleaved Caspase-3: green).

311 Scale bars = 200  $\mu$ m. Quantitative analysis of expression of Bcl-2 (d), Bax (e) and Cleaved Caspase-

312 3 (f) (n = 4 per group). Statistical significance was calculated using one-way ANOVA with Tukey's

313 posttest and data are presented as means  $\pm$  SD. \*\* $p$  < 0.01, \*\*\* $p$  < 0.001, \*\*\*\* $p$  < 0.0001. Source

314 data and  $p$ -values are provided in the Source Data file.

315

316

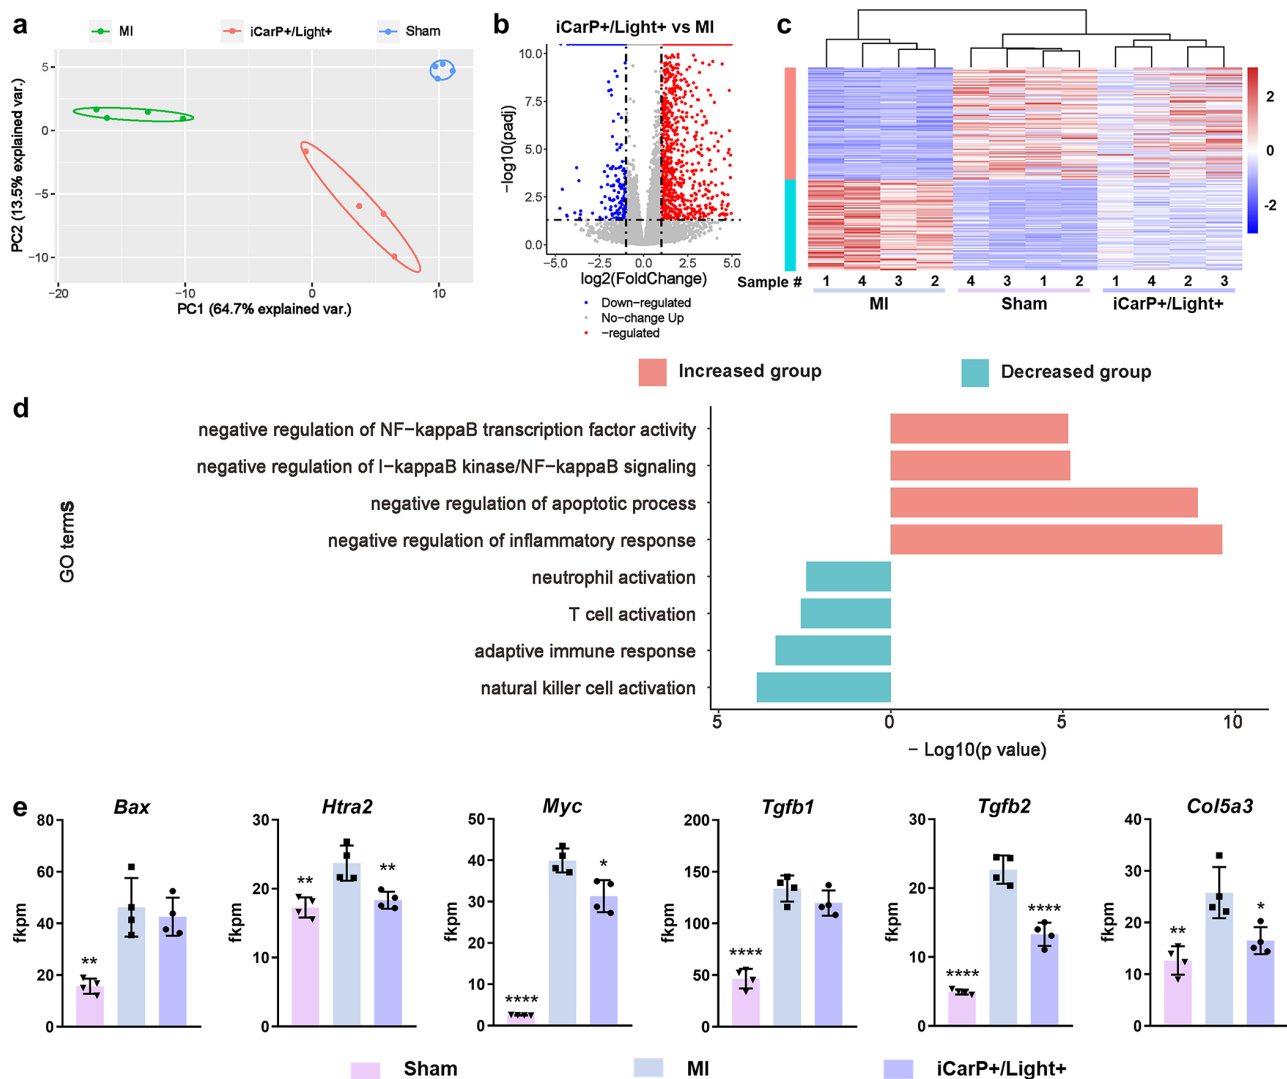

317

318 **Supplementary Figure 10. RNA-seq analysis of cardiac tissues 1 day after surgery.** a Principal  
 319 component analysis (PCA) of transcriptomes of LV myocardium from MI, iCarP+/Light+ and Sham  
 320 groups (n = 4 per group). b Volcano plot of all expressed genes from the iCarP+/Light+ and MI group  
 321 (n = 4 per group). The vertical dashed lines represent the border of gene expressions in the  
 322 iCarP+/Light+ group greater than 1-fold change vs the MI group. Dots above the horizontal dashed  
 323 line have adjusted  $p < 0.05$ , which was calculated using DESeq2 with Benjamini–Hochberg correction  
 324 (two-sided). c Clustering analysis of the Sham, MI, and iCarP+/Light+ groups using apoptosis-related  
 325 genes (Increased group, up-regulated genes in Sham and iCarP+/Light+ groups compared to in MI  
 326 group; Decreased group, down-regulated genes in Sham and iCarP+/Light+ groups compared to in  
 327 MI group; n = 4 per group). d Gene Ontology (GO) Biological Process (BP) analyses of iCarP effective  
 328 genes. Statistically enriched biological process annotations were identified through the online DAVID  
 329 bioinformatics resource (<https://david.ncifcrf.gov/summary.jsp>). One-tail Fisher Exact  $p$  value were  
 330 determined for the GO term analysis. e Expression levels of *Bax*, *Htra2*, *Myc*, *Tgfb1*, *Tgfb2* and

331 *Col5a3* genes in Sham, MI, and iCarP+/Light+ groups (n = 4 per group). Statistical significance was  
332 calculated using two-tailed unpaired t-test and data are presented as means ± SD. \**p* < 0.05, \*\**p* <  
333 0.01, \*\*\*\**p* < 0.0001 vs MI group. Source data and *p*-values are provided in the Source Data file.

334

335 Principal component analysis (PCA), volcano graph (Log<sub>2</sub>(fold change) > 1 or < -1, adjusted *p*  
336 value < 0.05) and clustering analysis shown in Supplementary Fig. 10a-c, demonstrated that iCarP  
337 triggered in situ photosynthesis significantly altered the transcriptome compared to MI group, and  
338 recovered the gene expressions to levels close to those in the Sham group. Gene Ontology (GO)  
339 Biological Process (BP) analysis revealed that up-regulated genes in the Sham and iCarP+/Light+  
340 group compared to the MI group were involved in negative regulation of NF-kappaB transcription  
341 factor activity, negative regulation of I-kappaB kinase/NF-kappaB signaling, negative regulation of  
342 apoptotic process and negative regulation of inflammatory response, indicating that in situ  
343 photosynthesis could protect the LV myocardium against MI by reducing apoptosis and inflammation,  
344 which is consistent with the histological results in Fig. 5. The down-regulated genes were involved in  
345 neutrophil activation, T cell activation, adaptive immune response and natural killer cell activation,  
346 supporting that in situ photosynthesis could reduce inflammation (Supplementary Fig. 10d).

347

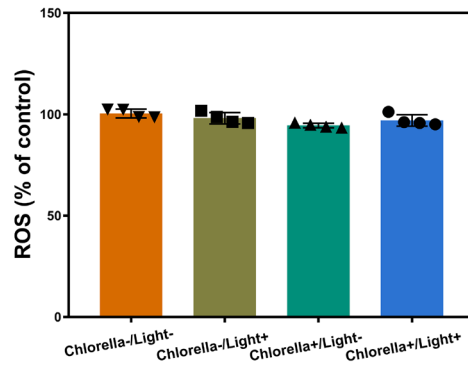

348

349 **Supplementary Figure 11. Effect of Chlorella and light on ROS accumulation in cardiomyocytes.**

350 Cells were stained by DCFH-DA (n = 4 per group), data are presented as means  $\pm$  SD.

351

352

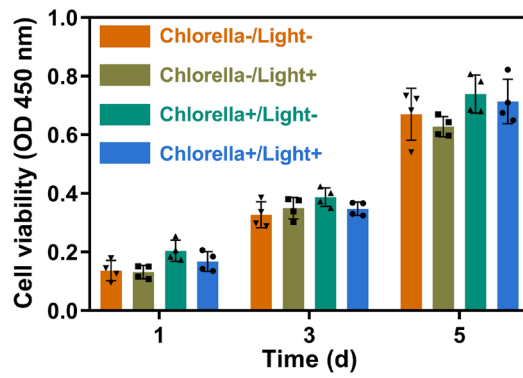

353

354 **Supplementary Figure 12. Effect of Chlorella and light on cardiac fibroblasts proliferation.** Data

355 are presented as means  $\pm$  SD, n = 4 per group.

356



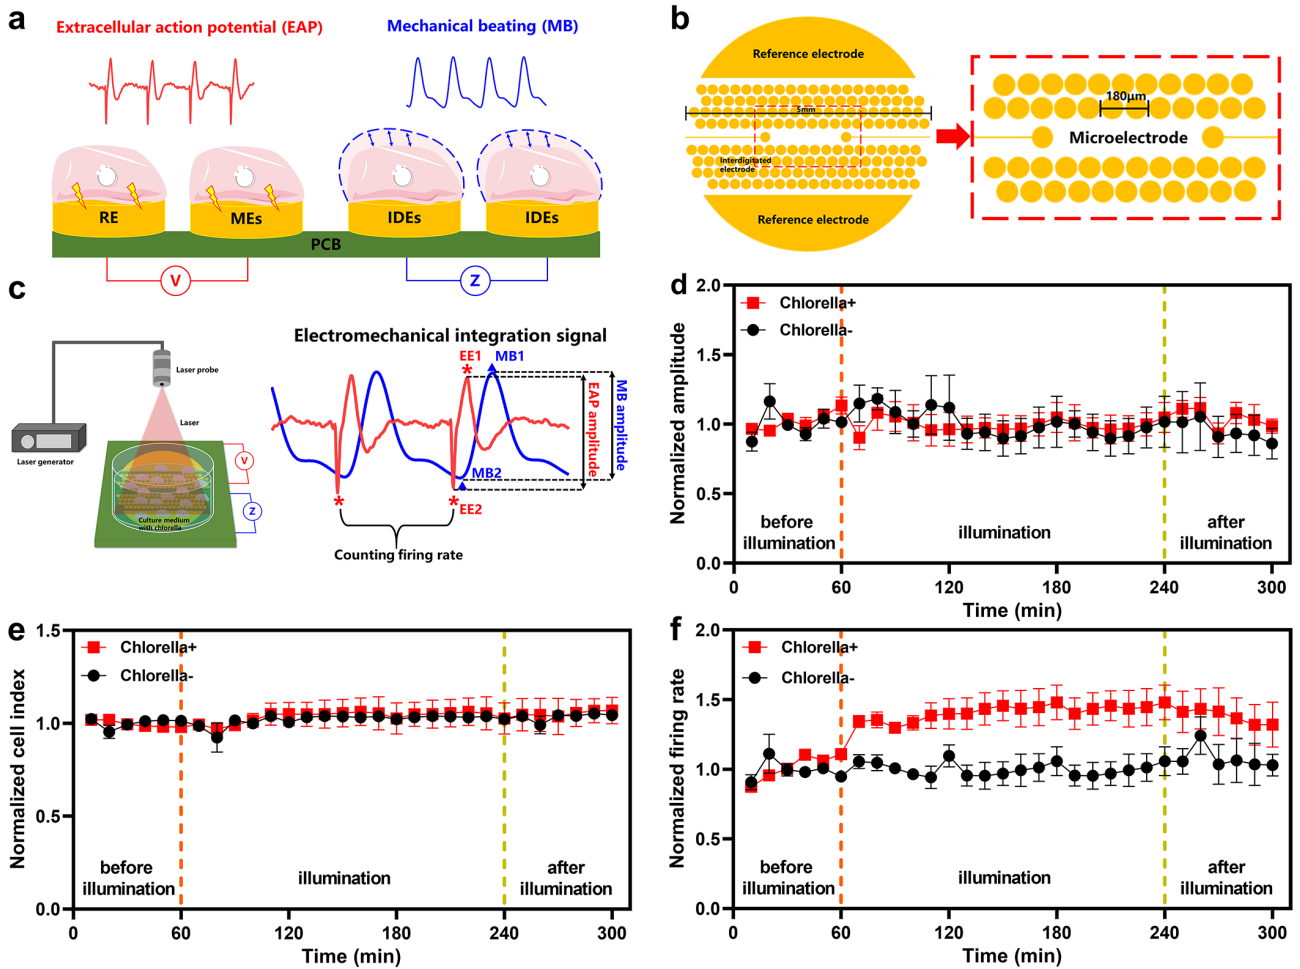

357

358 **Supplementary Figure 13. Effects of Chlorella and light on myocardial electrophysiology and**  
 359 **myocardial contractility in vitro.** **a** Schematic diagram of the sensor for simultaneous detection of  
 360 primary cardiomyocyte extracellular action potential and mechanical beating. **b** Electrode map of  
 361 microelectrodes and interdigitated electrodes. **c** Schematic diagram of the experiment and definition  
 362 of signal characteristic parameters. EE1 and EE2 were defined to label the peak, valley of extracellular  
 363 action potential. MB1 and MB2 were defined to label the peak, valley of mechanical beating. **d-f** Effect  
 364 of Chlorella and light on EAP amplitude (**d**), MB amplitude (**e**) and firing rate (**f**) in primary  
 365 cardiomyocytes (n = 4 per group), data are presented as means ± SEM.

366



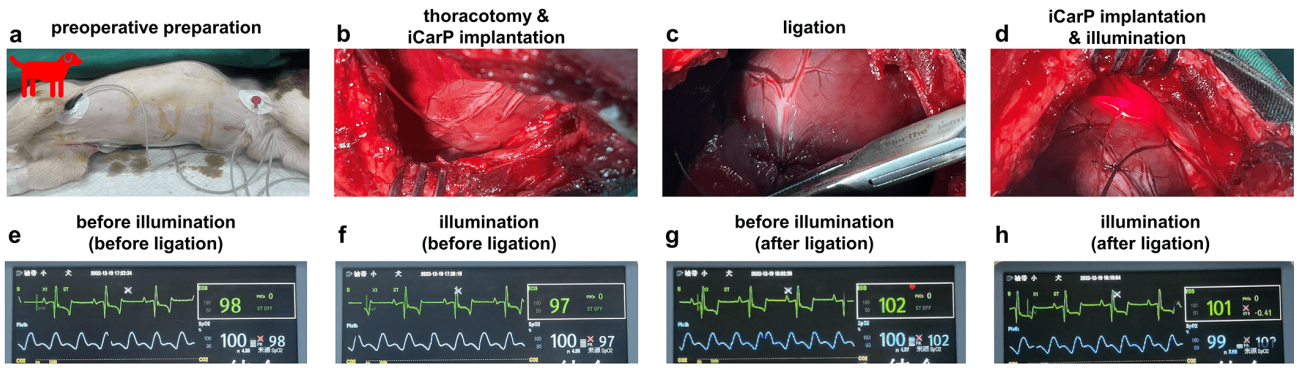

367

368

369

370

371

372

373

**Supplementary Figure 14. Effects of iCarP on heart rate of a dog. a** Preoperative preparation. **b** Thoracotomy & iCarP implantation. **c** Ligation of LAD and LCx. **d** ICarP implantation & illumination. **e-h** Dog heart rate measured by electrocardiogram at different stages of the surgery, including before illumination (before ligation) (**e**), during illumination (before ligation) (**f**), before illumination (after ligation) (**g**) and during illumination (after ligation) (**h**).

374

375 **Supplementary Reference**

- 376 1. Fang, W., Yang, L., Hong, L. & Hu, Q. A chitosan hydrogel sealant with self-contractile characteristic: From rapid  
377 and long-term hemorrhage control to wound closure and repair. *Carbohydr Polym* **271**, 118428 (2021).
- 378 2. Lu, Y., *et al.* A honeybee stinger-inspired self-interlocking microneedle patch and its application in myocardial  
379 infarction treatment. *Acta Biomater* **153**, 386-398 (2022).
- 380 3. Kim, D., Paggi, J.M., Park, C., Bennett, C. & Salzberg, S.L. Graph-based genome alignment and genotyping with  
381 HISAT2 and HISAT-genotype. *Nat Biotechnol* **37**, 907-915 (2019).
- 382 4. Liao, Y., Smyth, G.K. & Shi, W. featureCounts: an efficient general purpose program for assigning sequence reads  
383 to genomic features. *Bioinformatics* **30**, 923-930 (2014).
- 384 5. Love, M.I., Huber, W. & Anders, S. Moderated estimation of fold change and dispersion for RNA-seq data with  
385 DESeq2. *Genome Biol* **15**, 550 (2014).
- 386 6. Jiao, X., *et al.* DAVID-WS: a stateful web service to facilitate gene/protein list analysis. *Bioinformatics* **28**, 1805-  
387 1806 (2012).
- 388
